# Supplementary material
Source: publisher figshare collection journal article supplement (https://gsajournals.figshare.com/articles/dataset/_/7580054)
Supplement: Supplementary file 1 [file 2]

## Sheet: Sc BPA and BHA genomic
	Genomic Screens
ORF name	BPA Sensitive (-)	BHA sensitive (-)
YAL068C
YAL067C
YAL066W	-
YAL065C
YAL062W
YAL061W
YAL060W
YAL059W
YAL058W
YAL056W
YAL055W
YAL053W
YAL051W
YAL049C
YAL048C
YAL046C
YAL045C
YAL044C
YAL042W
YAL043C-a
YAL040C
YAL037W
YAL036C
YAL035W
YAL034C
YAL031C
YAL030W
YAL029C
YAL028W
YAL026C
YAL023C		-
YAL022C
YAL021C
YAL020C
YAL019W
YAL018C
YAL017W
YAL015C
YAL014C
YAL013W
YAL011W
YAL010C
YAL009W
YAL008W
YAL007C
YAL004W
YAL005C
YAL002W		-
YAR002W
YAR003W
YAR014C
YAR015W
YAR018C
YAR020C
YAR023C
YAR027W
YAR028W
YAR029W
YAR031W
YAR030C
YAR035W
YAR037W
YAR040C
YAR042W
YAR043C-a
YAR044W
YAR047C
YLL001W
YLL002W		-
YLL005C		-
YLL010C
YLL012W
YLL013C
YLL014W
YLL015W
YLL016W
YLL017W
YLL019C
YLL020C
YLL021W
YLL023C
YLL024C
YLL025W
YLL026W
YLL028W
YLL029W
YLL032C
YLL038C
YLL039C
YLL040C
YLL041C
YLL043W
YLL045C
YLL046C
YLL047W
YLL051C
YLL052C
YLL053C
YLL054C
YLL055W
YLL056C
YLL057C
YLL058W
YLL060C
YLL061W
YLL062C
YLL063C
YLR001C
YLR003C
YLR004C
YLR011W
YLR012C
YLR013W
YLR014C
YLR015W	-
YLR016C
YLR017W
YLR018C
YLR019W
YLR020C	-
YLR021W
YLR023C
YLR024C
YLR025W		-
YLR028C
YLR042C
YLR043C
YLR044C
YLR046C
YLR047C
YLR048W
YLR049C
YLR053C
YLR054C	-
YLR055C
YLR056W		-
YLR057W
YLR058C
YLR059C
YLR061W
YLR062C	-
YLR063W
YLR064W
YLR065C
YLR068W
YLR072W
YLR073C
YLR074C	-
YLR077W
YLR079W	-
YLR080W
YLR081W
YLR082C
YLR083C
YLR084C
YLR085C	-
YLR087C	-
YLR089C
YLR090W
YLR092W
YLR093C
YLR094C
YLR095C
YLR096W
YLR097C
YLR098C
YLR099C
YLR102C
YLR104W
YLR107W
YLR108C
YLR109W
YLR111W
YLR112W
YLR113W
YLR114C
YLR118C
YLR119W	-	-
YLR120C
YLR121C
YLR122C
YLR123C
YLR124W
YLR125W
YML089C
YML088W
YML087C
YML084W
YML083C
YML082W
YML081W
YML080W
YML079W
YML078W
YML063W
YML062C
YML060W
YML059C
YML058W
YML057W
YML058C-A
YML056C	-
YML055W
YML054C
YML053C
YML052W
YML051W
YML050W
YML048W
YML048W-A
YML037C
YML034W
YML035C-A
YML033W
YML032C
YML030W
YML029W
YML028W
YML026C
YML024W	-
YML020W
YML019W
YML018C
YML017W
YML016C
YML014W	-
YML013W	-
YML013C-A
YML012W
YML011C	-
YML010W-A	-
YML009c	-
YML008C	-
YML007W
YML006C
YML005W
YML004C
YML003W	-
YML002W
YMR002W
YMR003W
YMR006C		-
YMR007W		-
YMR008C
YMR009W
YMR010W
YMR011W
YMR012W
YMR014W
YMR016C
YMR017W
YMR018W
YMR019W		-
YMR020W
YMR022W
YMR023C
YMR024W
YMR025W
YMR026C
YMR027W
YMR029C
YMR030W
YMR031W-A
YMR031C
YMR032W	-
YMR034C
YMR036C
YMR039C		-
YMR040W
YMR041C
YMR042W
YMR044W
YMR140W
YMR141C
YMR143W
YMR144W
YMR145C
YMR147W
YMR148W
YMR153W
YMR153C-A
YMR155W
YMR156C
YMR157C		-
YMR158W-A
YMR159C
YMR160W
YMR161W
YMR162C
YMR163C
YMR164C
YMR166C
YMR167W
YMR169C
YMR170C
YMR172C-A
YMR173W-A
YMR174C
YMR175W
YMR176W
YMR177W
YMR178W
YMR179W
YMR180C
YMR182C
YMR183C
YMR184W
YMR185W
YMR186W
YMR187C	-
YMR188C
YMR189W
YMR190C
YMR192W
YMR194W
YMR193C-A	-
YMR195W
YMR196W
YMR198W
YMR199W
YMR201C
YMR202W	-
YMR204C
YMR205C
YMR206W
YMR207C
YMR210W	-
YMR214W	-
YMR215W
YMR216C
YMR219W
YMR221C
YMR222C		-
YMR223W
YMR224C	-
YMR225C
YMR226C
YMR230W
YMR232W
YMR233W
YMR234W
YMR237W
YMR238W
YMR241W
YMR242C
YMR243C
YMR244W
YMR245W
YMR244C-A
YMR246W
YMR247C	-
YMR250W	-
YMR251W
YMR251W-A
YMR252C
YMR253C
YMR254C
YMR255W
YMR258C
YMR259C
YMR261C
YMR262W
YMR263W
YMR264W
YMR265C
YMR269W
YMR272C
YMR273C
YMR274C
YMR275C
YMR276W
YMR278W
YMR280C
YMR283C
YMR284W
YMR285C
YMR289W
YMR291W
YMR292W
YMR294W
YMR294W-A
YMR295C
YMR297W
YMR299C
YMR300C
YMR302C
YMR303C
YMR304W		-
YMR304C-A
YMR305C
YMR306C-A
YMR307W		-
YMR310C
YNL339C
YNL338W
YNL336W
YNL335W
YNL334C
YNL333W
YNL332W
YNL329C
YNL328C
YNL327W
YNL326C
YNL324W
YNL325C
YNL323W
YNL322C
YNL321W
YNL320W
YNL319W
YNL318C
YNL314W
YNL311C
YNL307C
YNL305C
YNL304W
YNL303W
YNL302C	-
YNL301C
YNL299W
YNL298W		-
YNL296W	-
YNL297C		-
YNL295W
YNL294C
YNL293W
YNL292W		-
YNL291C
YNL289W
YNL288W
YNL286W
YNL285W
YNL283C	-
YNL281W
YNL280C	-
YNL278W
YNL275W
YNL273W
YNL271C
YNL270C
YNL269W
YNL266W
YNL265C
YNL264C
YNL259C
YNL257C		-
YNL255C
YNL254C
YNL253W
YNL249C
YNL248C
YNL246W
YOR001W
YOR002W
YOR003W
YOR005C
YOR006C
YOR007C
YOR008C
YOR009W
YOR010C
YOR011W
YOR012W
YOR013W
YOR014W
YOR015W
YOR016C
YOR017W
YOR018W
YOR019W
YOR021C
YOR022C
YOR023C
YOR024W
YOR025W
YOR026W
YOR027W
YOR028C
YOR029W
YOR030W
YOR031W
YOR032C		-
YOR033C
YOR034C
YOR035C	-
YOR036W
YOR037W
YOR038C
YOR039W
YOR040W
YOR041C
YOR042W
YOR043W
YOR044W
YOR045W
YOR047C
YOR049C
YOR050C
YOR051C
YOR052C
YOR053W
YOR054C	-
YOR055W
YOR058C
YOR059C
YOR061W
YOR062C
YOR064C
YOR066W
YOR067C		-
YOR068C
YOR069W		-
YOR070C		-
YOR071C
YOR072W
YOR073W
YOR076C
YOR078W
YOR079C
YOR080W
YOR081C
YOR082C
YOR083W	-
YOR084W
YOR085W
YOR086C
YOR087W
YOR088W
YOR089C
YOR090C
YOR091W
YOR092W
YOR093C
YOR094W
YOR289W
YER070W
YOR291W
YOR292C
YOR293W		-
YOR295W		-
YOR296W
YOR297C
YOR298W
YOR299W
YOR301W
YOR302W
YOR303W
YOR304C-A
YOR304W
YOR307C
YOR308C
YOR311C
YOR312C		-
YOR313C
YOR314W
YOR315W
YOR316C
YOR320C
YOR321W
YOR322C
YOR323C
YOR324C
YOR327C
YOR328W
YOR332W
YOR334W
YOR337W
YOR338W
YOR339C
YOR342C
YOR343C
YOR344C
YOR346W
YOR347C
YOR348C
YOR349W
YOR350C
YOR351C
YOR352W
YOR354C
YOR355W
YOR356W
YOR357C
YOR358W
YOR359W
YOR360C	-	-
YOR363C
YOR365C
YOR367W
YOR368W
YOR371C
YOR374W
YOR376W
YOR377W
YOR378W
YOR380W
YOR381W
YOR382W
YOR383C
YOR384W
YOR385W
YOR386W
YOL001W
YOL002C
YOL003C
YOL004W
YOL006C
YOL007C
YOL008W
YOL011W
YOL012C
YOL013C
YOL014W
YOL015W
YOL017W
YOL018C
YOL019W
YOL020W
YOL023W
YOL024W
YOL025W
YOL027C
YOL028C
YOL029C
YOL030W
YOL031C
YOL032W
YOL035C
YOL036W
YOL037C
YOL039W
YOL041C
YOL042W
YOL043C
YOL044W
YOL045W
YOL046C
YOL047C
YOL048C
YOL049W
YOL050C
YOL051W
YOL052C
YOL053C-A
YOL053W
YOL054W
YOL055C
YOL056W
YOL057W
YOL058W
YOL059W
YOL060C
YOL061W
YOL062C
YOL063C
YOL064C
YOL065C
YOL067C
YOL068C
YOL070C
YOL071W
YOL072W		-
YOL075C
YOL076W		-
YOL079W
YOL080C
YOL081W
YOL082W
YOL084W
YOL085C
YPL274W
YPL273W
YPL272C
YPL270W
YPL269W
YPL267W
YPL265W
YPL264C
YPL263C
YPL262W
YPL260W
YPL261C
YPL259C
YPL258C
YPL257W
YPL256C
YPL254W
YPL253C
YPL250C
YPL249C
YPL248C
YPL247C
YPL246C
YPL245W
YPL244C
YPL241C
YPL240C	-
YPL239W
YPL236C	-
YPL234C	-
YPL232W		-
YPL230W
YPL229W	-
YPL227C		-
YPL226W		-
YPL225W	-
YPL223C	-
YPL222W	-
YPL221W
YPL220W
YPL219W
YPL216W
YPL214C
YPL213W
YPL212C
YPL208W	-
YPL207W
YPL206C
YPL205C
YPL203W
YPL202C
YPL201C
YPL200W
YPL199C
YPL198W
YPL197C
YPL196W
YPL195W
YPL194W
YPL193W
YPL192C
YPL191C
YPL189W
YPL188W
YPL187W
YPL185W
YPL186C
YPL184C
YPL181W
YPL182C
YPL180W
YPL179W
YPL178W
YPL177C
YPL176C
YPL174C
YPL171C
YPL170W
YPL168W
YPL167C
YPL166W
YPL165C
YPL164C		-
YPL163C
YPL162C
YPL161C		-
YPL159C
YPL157W
YPL156C
YPL155C
YPL154C
YPL152W	-
YPL150W
YPL149W
YPL147W
YPL145C
YPL144W
YPL141C
YPL140C
YPL139C
YPL138C
YPL136W
YPL135W
YPL133C
YPL130W
YPL129W		-
YPL127C
YPL125W
YPL123C
YPL121C
YPL120W		-
YPL119C
YPL118W
YPL116W
YPL115C
YPL114W
YPL113C
YPL112C
YPL111W
YPL110C
YPL109C
YPL108W
YPL107W
YPL106C
YPL105C
YPL103C
YPL101W	-
YPL102C
YPL100W
YPL099C
YPL098C
YPL097W
YPL096W
YPL095C
YPL092W
YBR173C
YBR174C
YBR175W
YBR176W
YBR177C
YBR178W
YBR180W
YBR181C
YBR182C
YBR183W
YBR184W
YBR185C
YBR186W
YBR187W
YBR188C
YBR194W
YBR195C
YBR197C
YBR199W
YBR200W
YBR201W
YBR203W
YBR204C
YBR205W
YBR206W
YBR207W
YBR208C
YBR209W
YBR210W
YBR212W
YBR213W
YBR214W
YBR215W
YBR216C
YBR217W
YBR218C
YBR219C
YBR220C
YBR221C
YBR222C
YBR223C
YBR224W
YBR225W
YBR226C
YBR227C
YBR228W
YBR229C		-
YBR230C
YBR231C
YBR233W
YBR235W
YBR238C
YBR239C
YBR240C
YBR241C
YBR242W
YBR244W
YBR245C
YBR246W
YBR248C		-
YBR249C
YBR250W
YBR255W
YBR258C
YBR259W
YBR260C
YBR261C
YBR262C
YBR263W
YBR264C
YBR266C
YBR267W
YDR049W		-
YDR051C
YDR055W
YDR056C		-
YDR057W
YDR059C
YDR061W
YDR063W
YDR065W
YDR066C
YDR067C
YDR068W
YDR069C
YDR070C
YDR072C
YDR073W
YDR075W
YDR076W
YDR078C
YDR079W
YDR080W
YDR083W
YDR084C
YDR085C
YDR089W
YDR090C
YDR092W
YDR093W
YDR094W
YDR095C
YDR096W
YDR097C
YDR098C
YDR099W
YDR100W
YDR101C
YDR102C
YDR104C
YDR105C
YDR107C
YDR108W
YDR109C
YDR110W
YDR111C
YDR112W
YDR116C
YDR117C
YDR119W
YDR120C
YDR121W
YDR122W
YDR123C
YDR124W
YDR125C
YDR126W	-
YDR128W
YDR129C
YDR130C
YDR131C
YDR132C
YDR133C
YDR134C
YDR135C
YDR136C		-
YDR137W
YER055C
YDR139C
YDR140W
YDR142C
YDR143C
YDR144C
YDR146C
YDR338C
YDR340W
YDR344C
YDR345C		-
YDR346C
YDR348C
YDR349C
YDR351W
YDR352W
YDR354W
YDR357C
YDR358W
YDR359C
YDR360W
YDR363W
YDR364C		-
YDR368W
YDR369C
YDR370C
YDR371W
YDR372C		-
YDR374C
YDR378C
YDR379W
YDR380W
YDR382W
YDR383C
YDR384C
YDR385W
YDR386W
YDR387C
YDR388W
YDR389W	-
YDR391C
YDR392W		-
YDR393W
YDR395W
YDR399W
YDR400W
YDR401W
YDR402C
YDR403W
YDR405W
YDR406W
YDR408C
YDR409W
YDR410C
YDR411C
YDR414C	-
YDR415C
YDR418W
YDR419W	-
YDR420W
YDR421W
YDR422C
YDR423C
YDR425W
YDR426C
YDR428C
YDR430C
YDR431W
YDR432W
YDR433W
YDR435C
YDR436W
YEL001C
YEL003W
YEL005C
YEL006W
YEL007W
YEL008W
YEL009C
YEL010W
YEL013W
YEL014C
YEL015W
YEL016C
YEL017C-A
YEL017W
YEL018W
YEL020C
YEL023C
YEL024W
YEL025C
YEL027W		-
YEL028W
YEL030W
YEL031W		-
YEL033W
YER016W
YEL037C
YEL038W
YEL039C
YEL040W
YEL041W
YEL042W
YEL043W
YER028C
YEL045C
YEL046C
YEL047C
YEL048C
YEL049W
YEL050C
YEL051W
YEL052W
YEL053C
YEL054C
YEL056W
YEL057C
YEL059W
YEL060C
YEL061C
YEL062W
YEL063C
YEL064C
YEL065W
YEL066W
YEL067C
YEL068C
YEL071W
YEL072W
YER001W
YER002W
YER004W
YER005W
YER007C-A
YER007W
YER010C
YER011W
YER019W
YER019C-A
YER020W
YER024W
YER030W
YER033C
YER034W
YER035W
YER038W-A
YER040W
YER041W
YER042W
YER044C-A
YER045C
YER046W-A
YER047C
YER048C	-
YER049W
YER051W
YER053C
YER054C
YER056C
YER056C-A
YER058W
YER059W
YER060W
YER062C
YER065C
YER067W
YER067C-A
YER044C
YER068C-A
YER069W
YER071C
YER072W
YER073W
YER074W
YER075C
YER080W
YER081W
YER083C		-
YER084W
YER085C
YER086W
YER087W
YER087C-A
YGR123C
YGR124W
YGR125W
YGR126W
YGR127W
YGR129W
YGR130C
YGR131W
YGR132C
YGR133W
YGR135W
YGR136W
YGR137W
YGR138C
YGR139W
YGR141W	-
YGR142W
YGR143W
YGR144W
YGR146C
YGR148C
YGR149W
YGR151C
YGR152C
YGR153W
YGR154C
YGR157W
YGR159C
YGR160W
YGR161C
YGR163W
YGR164W
YGR165W
YGR166W
YGR168C
YGR169C
YGR170W		-
YGR173W
YGR176W
YGR177C
YGR178C
YGR181W
YGR182C
YGR183C
YGR184C	-
YGR187C
YGR189C
YGR192C
YGR193C
YGR194C
YGR196C
YGR197C
YGR199W
YGR200C
YGR202C
YGR203W
YGR205W
YGR206W
YGR207C
YGR208W
YGR209C
YGR212W
YGR213C
YGR214W
YGR217W
YHL047C
YHL046C
YHL045W
YHL044W
YHL043W
YHL040C
YHL037C
YHL036W
YHL035C
YHL034C
YHL033C
YHL032C
YHL031C
YHL028W
YHL027W
YHL026C
YHL023C
YHL022C
YHL020C
YHL019C
YHL017W
YHL014C
YHL013C
YHL012W
YHL010C
YHL009C
YHL008C
YHL006C
YHR001W-A
YHR012W
YHR013C
YHR014W
YHR015W
YHR018C
YHR021C
YHR022C
YHR028C
YHR029C
YHR030C		-
YHR031C
YHR033W
YHR034W
YHR035W
YHR037W
YHR038W
YHR039C
YHR043C
YHR044C
YHR046C
YHR047C
YHR048W
YHR049W
YHR049C-A
YHR050W
YHR057C
YHR060W		-
YHR061C
YHR066W
YHR073W	-
YHR075C
YHR076W
YHR077C
YHR078W
YHR079C		-
YHR080C
YHR081W
YHR082C
YHR086W
YHR087W
YHR092C
YHR093W
YHR094C
YHR095W
YHR096W
YHR097C
YHR100C
YHR103W
YHR104W
YHR105W
YHR106W
YHR108W
YHR109W
YHR110W
YHR111W
YHR112C
YHR113W
YHR114W
YHR115C
YHR116W
YHR117W
YHR121W
YHR123W		-
YHR124W
YHR125W
YHR126C
YHR129C
YHR130C
YHR132C
YHR133C
YHR134W
YHR135C
YHR136C
YHR137W
YHR138C
YHR139C
YHR139C-A
YHR142W
YHR143W
YHR151C
YHR152W
YHR153C
YHR154W
YHR155W		-
YHR156C
YHR157W
YHR158C
YHR159W
YHR160C
YHR161C
YHR163W
YHR167W
YHR178W
YHR179W
YHR182W
YHR183W
YHR184W	-
YHR189W
YHR195W
YHR198C
YHR199C
YHR200W
YHR202W
YHR203C
YHR204W
YHR206W
YHR207C
YHR209W
YHR210C
YCL001W
YCL002C
YCL003W
YCL005W
YCL007C
YCL008C	-
YCL009C
YCL011C
YCL012W
YCL013W	-
YCL014W
YCL016C
YCL024W
YCL025C
YCL026C		-
YCL027W
YCL028W
YCL029C
YCL033C
YCL034W		-
YCL036W
YCL037C	-
YCL039W
YCL040W
YCL042W
YCL044C
YCL045C
YCL046W		-
YCL047C
YCL048W
YCL049C
YCL050C
YCL051W
YCL055W
YCL056C
YCL057W
YCL060C		-
YCL061C
YCL062W
YCL063W
YCL064C
YCL069W
YCR001W
YCR004C		-
YCR005C
YCR006C
YCR007C
YCR008W
YCR009C
YCR010C
YCR011C
YCR014C
YCR015C
YCR016W
YCR017C
YCR019W
YCR020C
YCR020C-A	-
YCR021C
YCR022C
YCR023C
YLR420W
YLR451W
YLR126C
YLR128W
YLR130C
YLR131C
YLR133W
YLR134W
YLR135W	-
YLR136C
YLR137W
YLR138W	-
YLR142W	-
YLR143W
YLR149C	-
YLR150W
YLR151C
YLR152C
YLR154C	-
YLR164W	-
YLR165C	-
YLR168C	-
YLR169W
YLR170C
YLR171W
YLR172C
YLR173W
YLR174W
YLR176C
YLR177W
YLR178C
YLR179C	-
YLR180W
YLR181C
YLR182W
YLR183C
YLR184W
YLR185W
YLR187W
YLR188W
YLR189C
YLR190W
YLR191W
YLR193C
YLR194C
YLR199C
YLR200W
YLR204W
YLR205C
YLR206W
YLR207W
YLR209C
YLR210W
YLR211C
YLR213C
YLR214W
YLR216C
YLR217W
YLR218C
YLR219W
YLR220W
YLR221C
YLR224W
YLR225C
YLR226W
YLR227C
YKL001C
YKL006W
YKL007W
YKL008C
YKL009W
YKL010C
YKL011C
YKL015W
YKL017C
YKL020C
YKL023W
YKL025C
YKL026C
YKL027W
YKL029C
YKL031W
YKL032C
YKL034W	-
YKL037W	-
YKL038W
YKL039W
YKL040C
YKL041W
YKL043W
YKL044W
YKL046C
YKL047W
YKL048C
YKL050C
YKL051W
YKL053W
YKL054C
YKL055C
YKL056C
YKL057C
YKL061W
YKL062W
YKL063C
YKL064W
YKL065C
YKL066W
YKL067W
YKL069W
YKL070W
YKL071W
YKL072W
YKL073W
YKL074C
YKL075C	-
YKL076C	-
YKL077W	-
YKL079W
YKL080W
YKL081W		-
YKL084W
YKL085W
YKL086W
YKL090W
YKL091C
YKL092C
YKL093W
YKL094W
YKL096W
YKL097C
YKL098W
YKL100C
YKL101W
YKL102C
YKL103C
YKL105C
YKL106W
YKL107W
YKL109W
YKL110C
YKL113C		-
YKL116C
YKL117W
YKL118W	-
YKL119C	-
YKL120W
YKL121W
YKL123W
YKL124W
YKL126W
YKL127W
YKL128C
YKL129C
YKL130C
YKL131W
YKL132C		-
YKL133C		-
YKL136W
YKL137W
YKL140W
YKL142W
YKL143W
YKL146W
YKL147W
YKL148C
YKL149C
YKL150W
YKL151C
YKL155C
YKL156W
YKL157W
YKL158W
YKL159C
YKL160W		-
YKL161C
YKL162C
YKL163W
YKL164C
YKL166C
YKL167C
YKL168C
YKL171W
YKL174C
YKL175W
YKL176C
YKL179C
YKL183W
YKL184W
YKL185W
YKL187C
YKL188C
YKL190W
YGR027C
YGR031W
YGR033C
YGR034W
YGR035C
YGR036C		-
YGR037C
YGR039W
YGR041W
YGR042W
YGR043C
YGR044C
YGR045C
YGR049W
YGR051C
YGR052W
YGR054W
YGR055W
YGR056W	-
YGR057C
YGR058W
YGR059W
YGR061C
YGR064W
YGR066C
YGR067C
YGR068C
YGR069W
YGR070W
YGR071C
YGR072W
YGR077C
YGR078C
YGR079W
YGR080W
YGR081C
YGR084C
YGR085C
YGR087C
YGR088W
YGR096W
YGR097W
YGR100W
YGR101W
YGR104C
YGR105W
YGR107W
YGR108W
YGR109C
YGR111W
YGR112W
YGR118W
YGR121C
YGR122W
YOR097C
YOR099W
YOR100C
YOR101W
YOR104W
YOR105W
YOR106W
YOR107W
YOR108W
YOR109W		-
YOR111W
YOR112W
YOR113W
YOR114W
YOR115C
YOR118W
YOR120W
YOR121C
YOR123C
YOR124C
YOR126C
YOR129C
YOR130C
YOR131C
YOR132W
YOR133W
YOR134W
YOR135C
YOR136W
YOR137C
YOR138C
YOR139C
YOR140W
YOR142W
YOR144C
YOR152C
YOR153W	-	-
YOR154W
YOR156C
YOR161C
YOR162C
YOR163W
YOR164C
YOR165W
YOR166C
YOR167C
YOR170W		-
YOR171C		-
YOR172W
YOR173W
YOR175C
YOR177C
YOR178C
YOR179C
YOR180C
YOR182C
YOR183W
YOR184W
YOR185C
YOR186W
YOR188W
YOR189W
YOR190W
YOR191W
YOR192C
YOR193W
YOR195W
YOR196C
YOR197W
YOR198C		-
YOR199W
YOR200W
YOR201C
YOR202W
YOR205C
YOR208W
YOR209C		-
YOR213C
YOR214C
YOR215C
YOR216C
YOR219C
YOR220W	-
YOR221C
YOR222W
YOR223W
YOR225W
YOR226C
YOR227W
YOR228C		-
YOR229W
YOR230W
YOR231W
YOR233W
YOR234C
YOR235W
YOR237W
YOR238W
YOR239W
YOR240W
YOR242C		-
YOR243C
YOR245C
YOR246C		-
YOR247W
YOR248W
YOR251C
YOR252W
YOR253W
YOR255W
YOR258W	-
YOR263C
YOR264W
YOR277C
YOR279C
YOR280C
YOR283W
YOR284W
YOR285W
YOR286W
YOR288C
YJL218W
YJL217W
YJL216C
YJL215C
YJL214W
YJL212C
YJL210W
YJL211C
YJL208C
YJL207C
YJL199C	-
YJL198W
YJL197W
YJL193W
YJL192C
YJL190C	-
YJL188C	-
YJL187C
YJL186W
YJL185C
YJL183W
YJL181W
YJL182C
YJL179W
YJL178C
YJL176C	-
YJL171C
YJL170C
YJL169W
YJL168C
YJL166W
YJL164C
YJL162C
YJL160C
YJL159W
YJL158C
YJL157C
YJL155C
YJL154C		-
YJL153C
YJL152W
YJL150W
YJL149W
YJL148W
YJL147C
YJL146W
YJL145W
YJL144W
YJL142C
YJL135W
YJL134W
YJL133W
YJL132W
YJL131C
YJL129C		-
YLR324W
YLR325C
YLR326W
YLR327C
YLR328W
YLR329W
YLR330W
YLR331C
YLR332W
YLR333C
YLR335W
YOR300W
YMR038C
YLR341W
YLR342W
YLR391W
YLR392C
YLR393W
YLR395C
YOR364W
YLR398C
YLR006C
YLR400W
YLR401C
YLR402W
YLR403W
YLR404W
YLR405W
YLR407W
YLR408C
YLR410W
YLR412W
YLR413W
YLR414C
YLR415C
YLR416C
YLR417W
YLR418C
YLR421C
YDR147W
YDR148C
YDR149C
YDR150W
YDR151C
YDR152W
YDR153C
YDR154C
YDR155C
YDR156W
YDR157W
YDR158W
YDR159W
YDR161W
YDR162C
YDR163W
YDR165W
YDR169C
YDR171W
YDR176W
YDR178W
YDR179C
YDR179W-A
YDR181C
YDR183W
YDR184C
YDR185C
YDR186C
YDR191W
YDR192C
YDR193W		-
YDR195W	-
YDR198C
YDR199W
YDR200C		-
YDR203W	-
YDR204W
YDR206W
YDR207C
YDR209C
YDR210W
YDR213W
YDR214W
YDR215C
YDR216W
YDR217C
YDR218C
YDR219C
YDR220C
YDR221W
YDR222W
YDR223W
YDR225W
YDR226W
YDR229W
YDR231C
YDR233C
YDR234W
YDR237W
YDR239C
YDR241W
YLR027C
YML001W
YMR266W
YNL330C
YOR305W
YOR369C		-
YDR103W
YDR127W
YEL004W
YEL029C
YER032W
YER039C
YER052C
YER057C
YER060W-A
YER061C
YER066C-A
YER079W
YHL042W
YHL041W	-
YHL030W
YHL029C
YHL021C
YHL016C
YHL007C
YHL005C
YHL003C
YHR001W-A
YHR150W
YHR176W
YHR177W
YCL032W
YCR002C	-
YKL068W
YKL135C
YKL177W
YKL178C
YOR212W	-
YJL206C-A
YJL204C
YJL201W
YJL184W	-
YJL138C
YJL130C
YDR173C
YDR227W
YCL030C
YLR228 C
YLR231C
YLR232W
YLR236C
YLR238W
YLR241W
YLR247C
YLR248W
YLR250W
YLR251W
YLR252W
YLR253W
YLR254C
YLR255C
YLR257W
YLR258W
YLR260W
YLR261C
YLR262C
YLR263W
YLR264W
YLR265C
YLR266C
YLR267W
YLR268W
YLR269C
YLR270W
YLR271W
YLR273C
YLR278C
YLR279W
YLR280C
YLR281C
YLR282C
YLR283W
YLR284C
YLR285W
YLR287C
YLR287C-A
[truncated: 3,135 more rows]

## Sheet: gen screen BHA BPA comm
Common genes between genomic screen BPA and genomic screen BHA sensitive genes
S000002856	YDR448W	S. cerevisiae	ADA2	transcriptional ADAptor
S000003052	YGL084C	S. cerevisiae	GUP1	Glycerol UPtake
S000004109	YLR119W	S. cerevisiae	SRN2	Suppressor of Rna mutations, Number 2
S000004138	YLR148W	S. cerevisiae	PEP3	carboxyPEPtidase Y-deficient
S000004617	YMR015C	S. cerevisiae	ERG5	ERGosterol biosynthesis
S000005008	YNL064C	S. cerevisiae	YDJ1	Yeast dnaJ
S000005051	YNL107W	S. cerevisiae	YAF9	Yeast homolog of the human leukemogenic protein AF9
S000005679	YOR153W	S. cerevisiae	PDR5	Pleiotropic Drug Resistance

## Sheet: BHA gen screen list
				BHA genomic Screen sensitive genes
				Systematic name	Gene Name
				YDR448W	ADA2
				YMR157C	AIM36
				YNR030W	ALG12
				YPL227C	ALG5
				YOR067C	ALG8
				YPL051W	ARL3
				YPL161C	BEM4
				YOR198C	BFR1
				YNR051C	BRE5
				YGR036C	CAX4
				YDR364C	CDC40
				YNL298W	CLA4
				YCR086W	CSM1
				YPR135W	CTF4
				YGL027C	CWH41
				YCL026C	Deleted ORF
				YKL002W	DID4
				YKL002W	DID4
				YKL191W	DPH2
				YCL046W	Dubious ORF
				YOR170W	Dubious ORF
				YMR007W	dubious ORF
				YDR193W	Dubious ORF
				YBL094C	Dubious ORF
				YLR434C	Dubious ORF
				YML010C-B	Dubious ORF
				YDR008C	Dubious ORF
				YNR005C	Dubious ORF
				YNL140C	Dubious ORF
				YPR050C	Dubious ORF
				YNL136W	EAF7
				YLR436C	ECM30
				YKL160W	ELF1
				YOR246C	ENV9
				YHR123W	EPT1
				YLR056W	ERG3
				YMR015C	ERG5
				YFR019W	FAB1
				YER109C	FLO8
				YMR222C	FSH2
				YMR307W	GAS1
				YJR040W	GEF1
				YER083C	GET2
				YGL084C	GUP1
				YOR070C	GYP1
				YFL031W	HAC1
				YBR248C	HIS7
				YOR032C	HMS1
				YDR345C	HXT3
				YOR109W	INP53
				YHR079C	IRE1
				YOR171C	LCB4
				YPL055C	LGE1
				YCL034W	LSB5
				YER106W	MAM1
				YOL076W	MDM20
				YPL164C	MLH3
				YLR320W	MMS22
				YNL297C	MON2
				YER068W	MOT2
				YCL060C
				YHR147C	MRPL6
				YGR171C	MSM1
				YPR149W	NCE102
				YPL226W	NEW1
				YDR456W	NHX1
				YOR209C	NPT1
				YJR073C	OPI3
				YKR035C	OPI8, dubious ORF
				YKL133C	ORF, uncharacterized
				YOR228C	ORF, uncharacterized
				YDR056C	ORF, uncharacterized
				YPL066W	ORF, uncharacterized
				YNR061C	ORF, uncharacterized
				YBR285W	ORF, uncharacterized
				YBR196C-A	ORF, uncharacterized
				YGL188C-A	ORF, uncharacterized
				YOL164W-A	ORF, uncharacterized
				YOR034C-A	ORF, uncharacterized
				YOR360C	PDE2
				YNL231C	PDR16
				YOR153W	PDR5
				YLR148W	PEP3
				YKL197C	PEX1
				YDL065C	PEX19
				YDR479C	PEX29
				YMR006C	PLB2
				YCR024C-A	PMP1
				YAL023C	PMT2
				YHL011C	PRS3
				YGR170W	PSD2
				YNL292W	PUS4
				YKL113C	RAD27
				YDL090C	RAM1
				YPL089C	RLM1
				YKL132C	RMA1
				YBR229C	ROT2
				YDL082W	RPL13A
				YOR312C	RPL20B
				YBR191W	RPL21A
				YDL191W	RPL35
				YOR293W	RPS10A
				YOR369C	RPS12
				YDL061C	RPS29B
				YGR215W	RSM27
				YLL002W	RTT109
				YGL175C	SAE2
				YER129W	SAK1
				YNL257C	SIP3
				YHR030C	SLT2
				YLR025W	SNF7
				YEL031W	SPF1
				YKR031C	SPO14
				YLL005C	SPO75
				YDR392W	SPT3
				YGR063C	SPT4
				YLR119W	SRN2
				YDR293C	SSD1
				YPL232W	SSO1
				YOR242C	SSP2
				YMR019W	STB4
				YMR039C	SUB1
				YDR297W	SUR2
				YPL029W	SUV3
				YJL004C	SYS1
				YPL129W	TAF14
				YKL081W	TEF4
				YOL072W	THP1
				YGR162W	TIF4631
				YJL129C	TRK1
				YOR295W	UAF30
				YMR304W	UBP15
				YNL229C	URE2
				YHR026W	VMA16
				YHR060W	VMA22
				YEL027W	VMA3
				YDR049W	VMS1
				YKR001C	VPS1
				YJR102C	VPS25
				YPL065W	VPS28
				YPL120W	VPS30
				YJL154C	VPS35
				YPR173C	VPS4
				YOR069W	VPS5
				YDR484W	VPS52
				YDR136C	VPS61 (dubious ORF)
				YDR200C	VPS64
				YDR372C	VPS74
				YAL002W	VPS8
				YFL010C	WWM1
				YNL107W	YAF9
				YCR004C	YCP4
				YNL064C	YDJ1
				YHR155W	YSP1
				YJL056C	ZAP1

## Sheet: BPA subset
subset of null mutant strains analyzed for sensitivity to BPA
Systematic name	Standard name	Average GSV		A subset library was generated with strains identified in the BPA genomic screen. This subset was then re-screened against BPA in quadruplicate and GSVs calculated.
YDR448W	ADA2	0.13
YKL037W	AIM26	0.01
YEL036C	ANP1	0
YLR085C	ARP6	0.49
YLR242C	ARV1	0.17
YLR423C	ATG17	0
YLR295C	ATP14	0.23
YLR399C	BDF1	0.21
YER155C	BEM2	0.58
YLR015W	BRE2	0.13
YJL188C	BUD19	1.11
YLR074C	BUD20	0.27
YER014C-A	BUD25	0.64
YLR062C	BUD28	0.95
YER048C	CAJ1	0.17
YCR002C	CDC10	0.1
YGL206C	CHC1	0
YGR167W	CLC1	0.35
YNL225C	CNM67	0.39
YLR087C	CSF1	0.44
YKL139W	CTK1	0.05
YPL101W	ELP4	0.59
YLR372W	ELO3	0.06
YPL236C	ENV7	0
YDR414C	ERD1	1.06
YMR202W	ERG2	0
YNL280C	ERG24	0.39
YGL012W	ERG4	0.03
YMR015C	ERG5	0.13
YML008C	ERG6	0
YPL222W	FMP40	0.86
YBL042C	FUI1	0.32
YNL133C	FYV6	0.27
YBR179C	FZO1	0.22
YMR250W	GAD1	0.41
YJL184W	GON7	0.04
YDL022W	GPD1	0.24
YPL223C	GRE1	1.16
YGL084C	GUP1	0.02
YJL165C	HAL5	0
YOR258W	HNT3	0.81
YMR032W	HOF1	0.12
YOL123W	HRP1	0
YPL240C	HSP82	0.34
YGL168W	HUR1	0.05
YIL170W	HXT12	0.01
YML056C	IMD4	1.59
YJL106W	IME2	0.37
YBR107C	IML3	0.57
YMR035W	IMP2	1.17
YPL017C	IRC15	0.22
YDR532C	KRE28	0.21
YBL006C	LDB7	0.33
YMR021C	MAC1	0.45
YCR020C-A	MAK31	0.16
YJL199C	MBB1	1.23
YDL005C	MED2	0.06
YMR210W	MGL2	0.42
YJR008W	MHO1	0.99
YMR070W	MOT3	0.28
YMR224C	MRE11	0.12
YGL136C	MRM2	1.3
YML009C	MRPL39	0.8
YLR138W	NHA1	0.53
YMR091C	NPL6	0.03
YBL079W	NUP170	0.13
YGL038C	OCH1	0
YHR073W	OSH3	0.35
YLR054C	OSW2	0.29
YOR360C	PDE2	0.27
YOR153W	PDR5	0.03
YLR148W	PEP3	0
YMR231W	PEP5	0
YBR196C	PGI1	0.69
YDR466W	PKH3	0
YMR123W	PKR1	0.57
YDL188C	PPH22	1.21
YNL279W	PRM1	0.24
YKL077W	PSG1	0.86
YKL076C	PSY1	0.89
YLR165C	PUS5	0.44
YLR142W	PUT1	0.74
YDR419W	RAD30	0.16
YML011C	RAD33	0.37
YER095W	RAD51	0.09
YOR220W	RCN2	1
YDR195W	REF2	0.04
YOL143C	RIB4	0.33
YPL208W	RKM1	1.27
YMR247C	RKR1	0.71
YLR154C	RNH203	0.42
YJL140W	RPB4	0.49
YML024W	RPS17A	1.61
YNL302C	RPS19B	1.44
YPL152W	RRD2	0.38
YGR056W	RSC1	0.11
YDR289C	RTT103	0.39
YKL212W	SAC1	0.27
YDR389W	SAC7	0.82
YHR205W	SCH9	0.87
YMR214W	SCJ1	0.16
YBR171W	SEC66	1.12
YCL010C	SGF29	0.21
YOR035C	SHE4	0
YLR079W	SIC1	0.23
YNL243W	SLA2	0
YIL105C	SLM1	0
YLR135W	SLX4	0.46
YNR023W	SNF12	0
YJL127C	SPT10	0.02
YLR119W	SRN2	0.49
YCL037C	SRO9	0.27
YHR184W	SSP1	0.24
YOR212W	STE4	0.67
YCL008C	STP22	0.21
YDR126W	SWF1	0.09
YJL176C	SWI3	0.2
YAL016W	TPD3	0.09			\
YDR074W	TPS2	0.55
YML014W	TRM9	0.05
YKL034W	TUL1	0.42
YGR184C	UBR1	0.38
YML013W	UBX2	0.32
YLR168C	UPS2	0.28
YOR054C	VHS3	0.38
YLR373C	VID22	1.06
YPL234C	VMA11	0.94
YGR020C	VMA7	0.49
YCL005W-A	VMA9	0
YOR270C	VPH1	0.32
YKL119C	VPH2	0
YPL045W	VPS16	0
YMR077C	VPS20	0.07
YLR240W	VPS34	0
YGL095C	VPS45	0.97
YKR020W	VPS51	0.14
YGR141W	VPS62	0.95
YDR485C	VPS72	0.67
YNL283C	WSC2	0.88
YNL107W	YAF9	0.11
YNL064C	YDJ1	0
YLR020C	YEH2	0.52
YHR090C	YNG2	0.03
YAL066W		1.32
YCL013W		1.28
YCR087W		1.27
YHL041W		0.98
YKL075C		0.78
YKL118W		0.44
YDR203W		0.99
YJL022W		1.06
YLR149C		1.08
YLR179C		0.41
YML003W		1.32
YMR187C		1.41
YNL296W		0.67
YPL225W		1.2
YPL229W		1.2
YMR193C-A		1.2

## Sheet: BPA GSVs
subset of null mutant strains analyzed for sensitivity to BPA
Systematic name	Standard name	Average GSV (from 4 trials)
YEL036C	ANP1	0
YLR423C	ATG17	0
YGL206C	CHC1	0
YPL236C	ENV7	0
YMR202W	ERG2	0
YML008C	ERG6	0
YJL165C	HAL5	0
YOL123W	HRP1	0
YGL038C	OCH1	0
YLR148W	PEP3	0
YMR231W	PEP5	0
YDR466W	PKH3	0
YOR035C	SHE4	0
YNL243W	SLA2	0
YIL105C	SLM1	0
YNR023W	SNF12	0
YCL005W-A	VMA9	0
YKL119C	VPH2	0
YPL045W	VPS16	0
YLR240W	VPS34	0
YNL064C	YDJ1	0
YKL037W	AIM26	0.01
YIL170W	HXT12	0.01
YGL084C	GUP1	0.02
YJL127C	SPT10	0.02
YGL012W	ERG4	0.03
YMR091C	NPL6	0.03
YOR153W	PDR5	0.03
YHR090C	YNG2	0.03
YJL184W	GON7	0.04
YDR195W	REF2	0.04
YKL139W	CTK1	0.05
YGL168W	HUR1	0.05
YML014W	TRM9	0.05
YLR372W	ELO3	0.06
YDL005C	MED2	0.06
YMR077C	VPS20	0.07
YER095W	RAD51	0.09
YDR126W	SWF1	0.09
YAL016W	TPD3	0.09
YCR002C	CDC10	0.1
YGR056W	RSC1	0.11
YNL107W	YAF9	0.11
YMR032W	HOF1	0.12
YMR224C	MRE11	0.12
YDR448W	ADA2	0.13
YLR015W	BRE2	0.13
YMR015C	ERG5	0.13
YBL079W	NUP170	0.13
YKR020W	VPS51	0.14
YCR020C-A	MAK31	0.16
YDR419W	RAD30	0.16
YMR214W	SCJ1	0.16
YLR242C	ARV1	0.17
YER048C	CAJ1	0.17
YJL176C	SWI3	0.2
YLR399C	BDF1	0.21
YDR532C	KRE28	0.21
YCL010C	SGF29	0.21
YCL008C	STP22	0.21
YBR179C	FZO1	0.22
YPL017C	IRC15	0.22
YLR295C	ATP14	0.23
YLR079W	SIC1	0.23
YDL022W	GPD1	0.24
YNL279W	PRM1	0.24
YHR184W	SSP1	0.24
YLR074C	BUD20	0.27
YNL133C	FYV6	0.27
YOR360C	PDE2	0.27
YKL212W	SAC1	0.27
YCL037C	SRO9	0.27
YMR070W	MOT3	0.28
YLR168C	UPS2	0.28
YLR054C	OSW2	0.29
YBL042C	FUI1	0.32
YML013W	UBX2	0.32
YOR270C	VPH1	0.32
YBL006C	LDB7	0.33
YOL143C	RIB4	0.33
YPL240C	HSP82	0.34
YGR167W	CLC1	0.35
YHR073W	OSH3	0.35
YJL106W	IME2	0.37
YML011C	RAD33	0.37
YPL152W	RRD2	0.38
YGR184C	UBR1	0.38
YOR054C	VHS3	0.38
YNL225C	CNM67	0.39
YNL280C	ERG24	0.39
YDR289C	RTT103	0.39
YMR250W	GAD1	0.41
YLR179C		0.41
YMR210W	MGL2	0.42
YLR154C	RNH203	0.42
YKL034W	TUL1	0.42
YLR087C	CSF1	0.44
YLR165C	PUS5	0.44
YKL118W		0.44
YMR021C	MAC1	0.45
YLR135W	SLX4	0.46
YLR085C	ARP6	0.49
YJL140W	RPB4	0.49
YLR119W	SRN2	0.49
YGR020C	VMA7	0.49
YLR020C	YEH2	0.52
YLR138W	NHA1	0.53
YDR074W	TPS2	0.55
YBR107C	IML3	0.57
YMR123W	PKR1	0.57
YER155C	BEM2	0.58
YPL101W	ELP4	0.59
YER014C-A	BUD25	0.64
YOR212W	STE4	0.67
YDR485C	VPS72	0.67
YNL296W		0.67
YBR196C	PGI1	0.69
YMR247C	RKR1	0.71
YLR142W	PUT1	0.74
YKL075C		0.78
YML009C	MRPL39	0.8
YOR258W	HNT3	0.81
YDR389W	SAC7	0.82
YPL222W	FMP40	0.86
YKL077W	PSG1	0.86
YHR205W	SCH9	0.87
YNL283C	WSC2	0.88
YKL076C	PSY1	0.89
YPL234C	VMA11	0.94
YLR062C	BUD28	0.95
YGR141W	VPS62	0.95
YGL095C	VPS45	0.97
YHL041W		0.98
YJR008W	MHO1	0.99
YDR203W		0.99
YOR220W	RCN2	1
YDR414C	ERD1	1.06
YLR373C	VID22	1.06
YJL022W		1.06
YLR149C		1.08
YJL188C	BUD19	1.11
YBR171W	SEC66	1.12
YPL223C	GRE1	1.16
YMR035W	IMP2	1.17
YPL225W		1.2
YPL229W		1.2
YMR193C-A		1.2
YDL188C	PPH22	1.21
YJL199C	MBB1	1.23
YPL208W	RKM1	1.27
YCR087W		1.27
YCL013W		1.28
YGL136C	MRM2	1.3
YAL066W		1.32
YML003W		1.32
YMR187C		1.41
YNL302C	RPS19B	1.44
YML056C	IMD4	1.59
YML024W	RPS17A	1.61

## Sheet: subset strains sens to BHA
Genes sensitive to BHA from subset library								The subset of strains that were sensitivity to BPA were screened against BHA in quadruplicate. Shown are the 42 genes that when deleted confer sensitivity to BHA.
YAL016W	S. cerevisiae	TPD3	tRNA Processing Deficient
YBR171W	S. cerevisiae	SEC66	SECretory
YCL008C	S. cerevisiae	STP22	STerile Pseudoreversion
YER155C	S. cerevisiae	BEM2	Bud EMergence
YHL041W	S. cerevisiae
YHR205W	S. cerevisiae	SCH9
YIL170W	S. cerevisiae	HXT12	HeXose Transporter
YKL139W	S. cerevisiae	CTK1	Carboxy-Terminal domain Kinase
YDL005C	S. cerevisiae	MED2	MEDiator complex
YDR074W	S. cerevisiae	TPS2	Trehalose-6-Phosphate Synthase/phosphatase
YDR448W	S. cerevisiae	ADA2	transcriptional ADAptor
YGL038C	S. cerevisiae	OCH1	Outer CHain elongation
YGL095C	S. cerevisiae	VPS45	Vacuolar Protein Sorting
YGL167C	S. cerevisiae	PMR1	Plasma Membrane ATPase Related
YGL168W	S. cerevisiae	HUR1	HydroxyUrea Resistance
YGL206C	S. cerevisiae	CHC1	Clathrin Heavy Chain
YGR020C	S. cerevisiae	VMA7	Vacuolar Membrane Atpase
YGR056W	S. cerevisiae	RSC1	Remodel the Structure of Chromatin
YGR167W	S. cerevisiae	CLC1	Clathrin Light Chain
YJL127C	S. cerevisiae	SPT10	SuPpressor of Ty
YJL140W	S. cerevisiae	RPB4	RNA Polymerase B
YJL188C	S. cerevisiae	BUD19	BUD site selection
YJR008W	S. cerevisiae	MHO1	Memo HOmolog
YLR015W	S. cerevisiae	BRE2	BREfeldin A sensitivity
YLR062C	S. cerevisiae	BUD28	BUD site selection
YLR372W	S. cerevisiae	ELO3	fatty acid ELOngation
YML008C	S. cerevisiae	ERG6	ERGosterol biosynthesis
YML009W-B	S. cerevisiae
YML024W	S. cerevisiae	RPS17A	Ribosomal Protein of the Small subunit
YMR123W	S. cerevisiae	PKR1	Pichia farinosa Killer toxin Resistance
YMR202W	S. cerevisiae	ERG2	ERGosterol biosynthesis
YNL064C	S. cerevisiae	YDJ1	Yeast dnaJ
YNL243W	S. cerevisiae	SLA2	Synthetic Lethal with ABP1
YNL280C	S. cerevisiae	ERG24	ERGosterol biosynthesis
YNL296W	S. cerevisiae
YOL143C	S. cerevisiae	RIB4	RIBoflavin biosynthesis
YOR035C	S. cerevisiae	SHE4	Swi5p-dependent HO Expression
YOR153W	S. cerevisiae	PDR5	Pleiotropic Drug Resistance
YOR270C	S. cerevisiae	VPH1	Vacuolar pH
YPL229W	S. cerevisiae
YPL234C	S. cerevisiae	VMA11	Vacuolar Membrane Atpase
YCL005W-A	S. cerevisiae	VMA9	Vacuolar Membrane Atpase

## Sheet: subset BHA and BPA sens genes
	Genes sensitive to both BHA and BPA from subset library
YDR448W	S. cerevisiae	ADA2	transcriptional ADAptor
YER155C	S. cerevisiae	BEM2	Bud EMergence
YLR015W	S. cerevisiae	BRE2	BREfeldin A sensitivity
YGL206C	S. cerevisiae	CHC1	Clathrin Heavy Chain					subset of genes that were originally sensitive to BPA were rescreened against BHA in quadruplicate resulting in 42 genes sensitive to BHA. This gene list was compared to the 124 genes that are BPA sensitive and 31 genes are in common.
YGR167W	S. cerevisiae	CLC1	Clathrin Light Chain
YKL139W	S. cerevisiae	CTK1	Carboxy-Terminal domain Kinase
YLR372W	S. cerevisiae	ELO3	fatty acid ELOngation
YMR202W	S. cerevisiae	ERG2	ERGosterol biosynthesis
YNL280C	S. cerevisiae	ERG24	ERGosterol biosynthesis
YML008C	S. cerevisiae	ERG6	ERGosterol biosynthesis
YIL170W	S. cerevisiae	HXT12	HeXose Transporter
YDL005C	S. cerevisiae	MED2	MEDiator complex
YGL038C	S. cerevisiae	OCH1	Outer CHain elongation
YOR153W	S. cerevisiae	PDR5	Pleiotropic Drug Resistance
YMR123W	S. cerevisiae	PKR1	Pichia farinosa Killer toxin Resistance
YOL143C	S. cerevisiae	RIB4	RIBoflavin biosynthesis
YJL140W	S. cerevisiae	RPB4	RNA Polymerase B
YGR056W	S. cerevisiae	RSC1	Remodel the Structure of Chromatin
YHR205W	S. cerevisiae	SCH9
YOR035C	S. cerevisiae	SHE4	Swi5p-dependent HO Expression
YNL243W	S. cerevisiae	SLA2	Synthetic Lethal with ABP1
YJL127C	S. cerevisiae	SPT10	SuPpressor of Ty
YCL008C	S. cerevisiae	STP22	STerile Pseudoreversion
YAL016W	S. cerevisiae	TPD3	tRNA Processing Deficient
YDR074W	S. cerevisiae	TPS2	Trehalose-6-Phosphate Synthase/phosphatase
YPL234C	S. cerevisiae	VMA11	Vacuolar Membrane Atpase
YGR020C	S. cerevisiae	VMA7	Vacuolar Membrane Atpase
YCL005W-A	S. cerevisiae	VMA9	Vacuolar Membrane Atpase
YOR270C	S. cerevisiae	VPH1	Vacuolar pH
YGL095C	S. cerevisiae	VPS45	Vacuolar Protein Sorting
YNL064C	S. cerevisiae	YDJ1	Yeast dnaJ
