# Supplementary material
Source: publisher figshare collection journal article supplement (https://gsajournals.figshare.com/articles/dataset/_/7580054)
Supplement: Supplementary file 1 [file 2]

### S3. Hierarchical clustering of growth fitness profiles of *S. pombe* genomic deletion mutants in response to BHA (0.3 mM), BHT (0.6 mM), and BPA (0.6 mM)

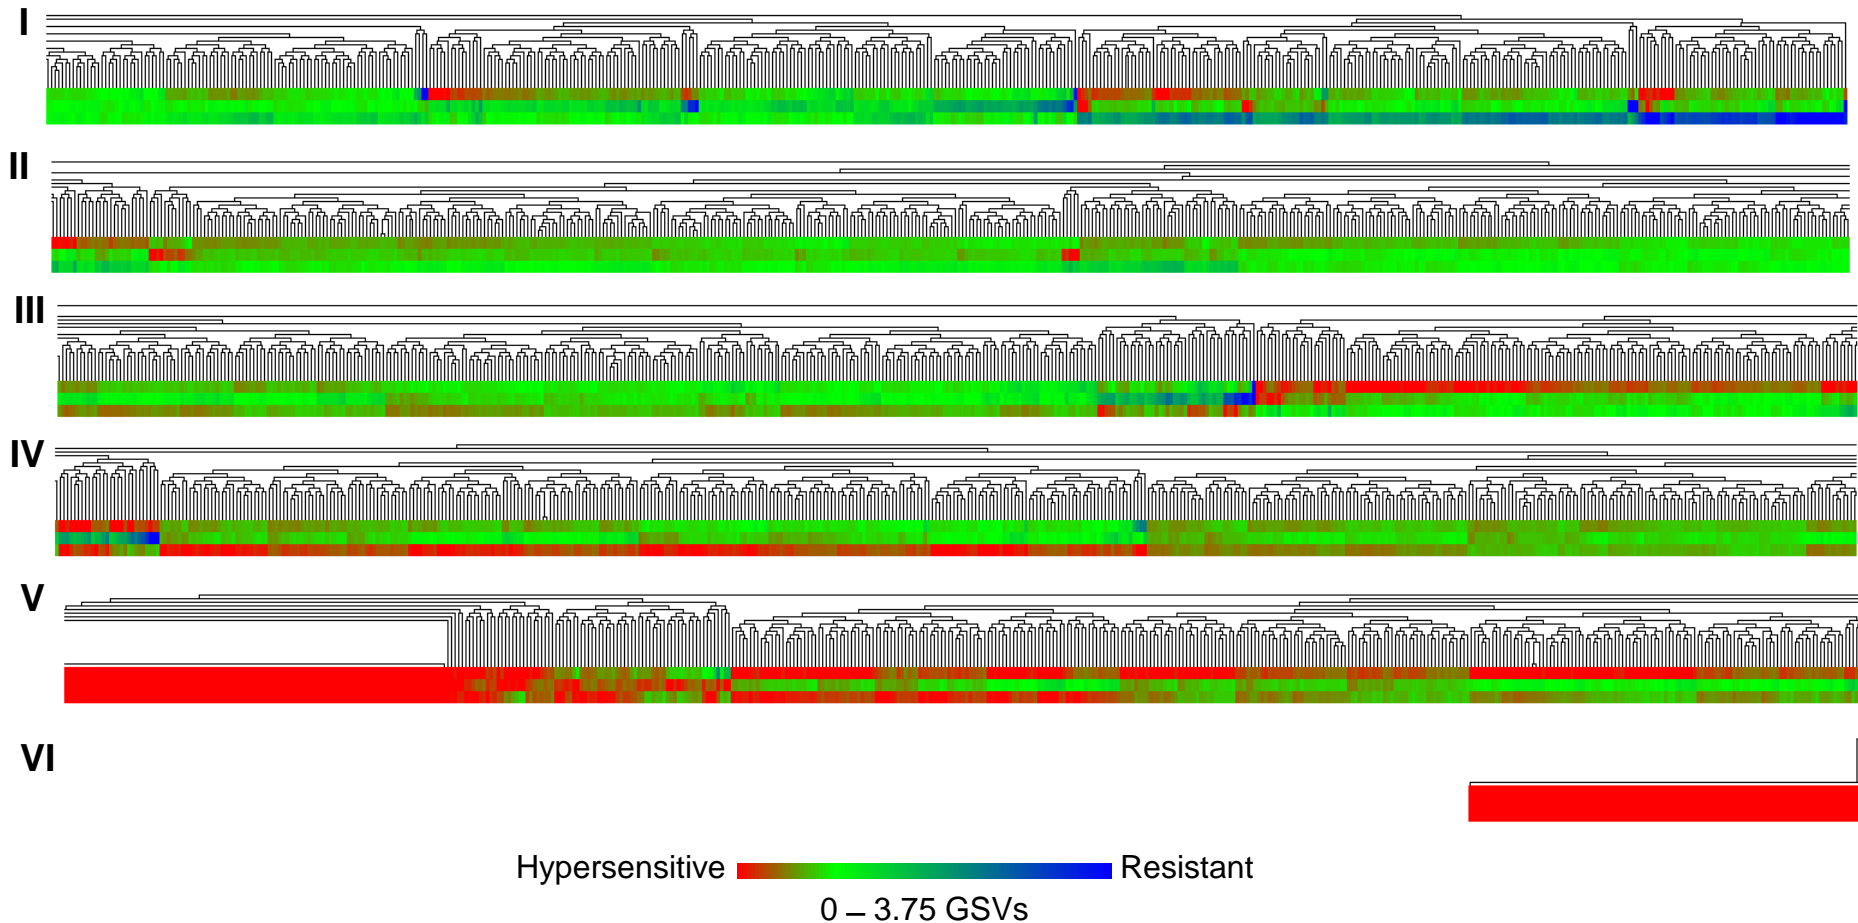

Each square in the matrix represents the growth score value (GSV) of a deletion strain of *S. pombe* in the presence of a phenol derivative. The GSV was calculated as a ratio of the digitized treated and untreated growth values divided by those of *wt* strains. Red codes for least growth while blue for most growth. The GSVs range from 0–3.75, with the values equal or larger than 2.0 being resistant (blue),  $GSV < 0.5$  being stringently sensitive (red), and  $0.5 < GSV < 2$  being no growth phenotype (green). Upper row is BHA; middle row, BHT; lower row, BPA. More than 2,500 haploid-deletion mutants were screened for growth sensitivity to the phenol derivatives. Cluster arrays I–V each contain 500 genes. In constructing sensitive strain lists in Table 3 combining the results by visual inspection, a deletion strain is defined as sensitive when  $GSV < 1$ .
